# Supplementary material for: Hypersensitive intercellular responses of endometrial stromal cells drive invasion in endometriosis
Source: eLife. 2024 Dec 11;13:e94778. doi: 10.7554/eLife.94778 (PMC11729374; doi:10.7554/eLife.94778)
Supplement: Figure 1—source data 1. [file elife-94778-fig1-data1.xlsx]

## Sheet: Sheet1
Figure 1B: Adhesion of cells
	Max Detachment Force, nN				Fig 1B: Anova1way (Tukey)
	PMC	EEC	ESC			MeanDiff	SEM	q Value	Prob	Alpha	Sig	LCL	UCL
	0.09305	0.25704	0.78492		PMC	0.04079	0.07252	0.79544	0.84255	0.05	0	-0.15801	0.23959
	0.10591	0.11687	1.11116		ESC vs PMC	0.91093	0.07944	16.216	1.18679e-06	0.05	1	0.69315	1.12871
	0.15832	0.12323	1.23386		ESC vs EEC	0.87014	0.08581	14.3408	3.77163e-06	0.05	1	0.63491	1.10536
	0.12409	0.19555
	0.13201
	0.1809
Average	0.13238	0.173173	1.04331
SE	0.0136212	0.0331647	0.13649
Figure 1E: ESC Invasion (1% serum gradient)
	LP9 PMCs				Primary PMCs
Type	ESC Patient	ESC Invasion LP9 PMCs	n	2 tailed T-test	Ctrl PMC (n=5)	Endo PMC (n=3)	Avg ESC Invasion	n	2 tailed T-test
Control	1	5.5	2
	14	2	1		5.9	1.3	4.4	6
	33	1	1
	34	2	1
	36	0	1
	38	1.5	2		4.2	1.6	3.5	8
Avg Ctrl. ± SE		2.0 ± 0.76	6(8)		4.9	1.9	3.85	14
Endom I-II	4	2	1
	35	2	1
	39	3	1
	43	5	1
	Avg I-II ± SE	3.0 ± 0.71	4	NS
Endom III-IV	3	21.2	4
	7	6	1
	41	11	1		7.3	7.4	7.3	8
	42	12	1		10.7	7.8	9.5	7
	Avg III-IV ± SE	12.6 ± 2.37	4(7)	0.004
Avg Endo. ± SE		7.8 ± 2.4	8(11)	0.007	8.8	7.6	8.35	15	0.004
Figure 1F: EEC influence on ESC invasion (no serum gradient)
Type	Patient	(ESC+EEC) ESC	n	2 tailed T-test	% ESC*
Control	10	1.65	1
	14	0.35	1		99
	17	2.67	1		71
	33	0.83	1		92
	34	1.27	4		72
	38	2.57	1
Avg Ctrl ± SE		1.46 ± 0.25	6(9)	NS	83.5
Endom. I-II	23	2.42	1
	43	2.15	1		72
Endom. III-IV	5	0.68	1
	7	2.74	1
	19	2.87	1		75
	42	3.03	2		33
Avg Endo ± SE		2.08 ± 0.36	7(8)	0.01	60
*in a subset of experiments, EECs and ESCs were each labelled with different lipophilic dyes to track
