# Supplementary material for: Hypersensitive intercellular responses of endometrial stromal cells drive invasion in endometriosis
Source: eLife. 2024 Dec 11;13:e94778. doi: 10.7554/eLife.94778 (PMC11729374; doi:10.7554/eLife.94778)
Supplement: Figure 2—source data 1. [file elife-94778-fig2-data1.xlsx]

## Sheet: Sheet1
Figure 2 C Motility (ESC only)					Figure 2D Motility (ESC + PMC)
Type	Patient	% wound healed/hr	n	2 tailed T-test	ESC+PMC ESC	n	2 tailed T-test
Control	9	1.22	1
	10	1.42	2
	12	0.411	1
	17	0.98	3		0.9	2
	25	1.41	2		1.5	2
	30	1.66	1
	33	3.25	1
	36	0.96	1
	38	1.25	1
	H11	1.32	1		1.1	1
	H19	0.69	1		1.4	4
	H20	1.05	1		1.1	4
	H25	0.69	1		1.3	4
	H27	0.74	1		1.35	1
	H47	1.6	1		0.9	4
Avg Ctrl. ± SE		1.24 ± 0.17	15(19)		1.17 ± 0.06	8(22)
Endom I-II	24	1.97	1
	27	1.68	1
	31	3.12	1
	32	2.68	2
	Avg I-II ± SE	2.36 ± 0.33	4(5)	0.01
Endom III-IV	2	4.02	1
	3	2.14	5		1.38	7
	5	2.16	6		1.1	1
	6	2.46	2
	7	3.88	2		1.5	1
	19	1.25	6		1.73	4
	42	2.4	1
	Avg III-IV ± SE	2.62 ± 0.38	7(23)	0.002	1.47 ± 0.09	4(13)	0.007
Avg Endo. ± SE		2.52 ± 0.26	11(28)	0.0001
