# Supplementary material for: Hypersensitive intercellular responses of endometrial stromal cells drive invasion in endometriosis
Source: eLife. 2024 Dec 11;13:e94778. doi: 10.7554/eLife.94778 (PMC11729374; doi:10.7554/eLife.94778)
Supplement: Figure 3—source data 1. [file elife-94778-fig3-data1.xlsx]

## Sheet: Sheet1
Figure 3B Homocellular ESC coupling					Figure 3D Induction of ESC coupling by PMCs
Type	patient	ESC-ESC	n	2 tailed T-test	ESC-PMC ESC-ESC	n	2 tailed T-test
Control	1	0.29	1		2.4	1
	9	0.4	3		2.02	3
	10	0.49	2		0.65	1
	14	0.73	2		2.07	2
	17	0.71	3		1.63	3
	21	0.74	5		2.35	3		3
	25	0.35	2		1.79	2
	33	0.84	5		2.6	3
	36	1.5	2		2.47	2
	38	2.3	1		2.2	1
Avg ± SE		0.84 ± 0.2	10(26)		2.02 ± 0.18	10(21)
Endom I-II	4	0.24	2		2.23	2
	16	0.25	2		2.26	1
	24	1.13	1		1.4	1
	26	0.78	1		1.24	1
	27	0.57	2		0.67	1
	31	0.69	5		3.2	5
	32	0.32	2		1.02	2
	39	0.59	1		3.4	1
	Avg I-II ± SE	0.57 ± 0.11	8(16)	NS	1.9 ± 0.36	8(14)	NS
Endom III-IV	2	0.3	2		2.92	2
	3	0.3	5		3.11	5
	6	0.53	2		1.66	2
	7	0.78	6		2.53	2
	13	0.51	3		3.68	3
	15	0.55	3		1.92	3
	19	0.74	3		4.53	2
	40	0.31	1		5.6	1
	Avg III-IV ± SE	0.50 ± 0.07	8(25)	0.025	3.24 ± 0.47	8(20)	0.01
Avg ± SE		0.53 ± 0.06	16(43)	NS	2.6± 0.33	16(43)	0.21
