# Supplementary material for: Hypersensitive intercellular responses of endometrial stromal cells drive invasion in endometriosis
Source: eLife. 2024 Dec 11;13:e94778. doi: 10.7554/eLife.94778 (PMC11729374; doi:10.7554/eLife.94778)
Supplement: Figure 4—source data 3. [file elife-94778-fig4-data3.xlsx]

## Sheet: Sheet1
Figure 4C: Coupling (shRNA Block of ESC or PMC)
Type (patient #)	shRNA	Scr/unt (%)	Cx43/unt (%)	2-tailed T-test
LP9 PMCs	2	81	8
	3		4
	4		6
Avg			6	0.007
Endom ESCs (15)	1	108	0
	2		2
	3		0
	4		2
Avg			1	0.0003
Figure 4D: Invasion (shRNA Block of ESC or PMC)
Type (patient #)	shRNA	uninfected (39%)	infected (61%)	infected* uninfected	n**	2-tailed T-test
Endom. III-IV (15)	2(ESC)	38	5.3	0.0891717	10
	3 (ESC)	31	2.9	0.0598096	10
	4 (ESC)	35	6.3	0.115082	10
	Avg	34.6667	4.83333	0.0880211		0.0002
Endom. III-IV (13)	DN (ESC)	31	0.3	0.0061872	10	1e-05
	3 (PMC)	39	4.5	0.115385	10
	4 (PMC)	39	5.8	0.148718	10
	Avg	39		0.135		0.0002
	DN (PMC)	35	11.5	0.328571	10	0.0005
* corrected for average infection efficiency of 61+/- 8%
** n equal technical replicates
