# Supplementary material for: Hypersensitive intercellular responses of endometrial stromal cells drive invasion in endometriosis
Source: eLife. 2024 Dec 11;13:e94778. doi: 10.7554/eLife.94778 (PMC11729374; doi:10.7554/eLife.94778)
Supplement: Figure 5—source data 1. [file elife-94778-fig5-data1.xlsx]

## Sheet: Sheet1
	Figure 5D: ESCs on PMC penetration
	Penetration, microm
ESC	none	Ctrl	Endo
	3.17	2.59	5.35
	3.09	2.34	7.75
	3.82	2.5	3.87
	2.65	2.67	9.2
	2.16	3.52	6.75
	2.38	1.95	6.55
	1.16	5.79	2.93
	3.77	6.27	6.65648
	2.67	5.3	5.35579
	2.47	6.89	3.3665
	3.87	4.4	7.23031
	3.4	4.94	2.67789
	2.8	4.03	11.0559
	3.31	3.98
	2.55	4.76
	3.4	5
	2.98	4.79
	2.74	5.68
	4.68	3.27
	2.54	4.79
	3	5.68
	4.62	3.27
	4.66
	3.37
	2.01
	3.64
	4.04
	2.815
	2.12
	3.11
	4.68
	4.21
	4.64
	4.4
Average	3.2625	4.29136	6.05714
SE	0.153655	0.294774	0.691673
Figure 5D: Anova1way (Tukey) for above Table
			MeanDiff	SEM	q Value	Prob	Alpha	Sig	LCL	UCL
PMC+ESC Ctrl vs. PMC			0.98329	0.42341	3.28427	0.05996	0.05	0	-0.03301	1.99958
PMC+ESC Endo vs. PMC			2.79464	0.48203	8.19913	6.73523e-07	0.05	1	1.63764	3.95165
PMC+ESC Endo vs. PMC+ESC Ctrl			1.81135	0.53206	4.81456	0.00328	0.05	1	0.53425	3.08845
