# Supplementary material for: Hypersensitive intercellular responses of endometrial stromal cells drive invasion in endometriosis
Source: eLife. 2024 Dec 11;13:e94778. doi: 10.7554/eLife.94778 (PMC11729374; doi:10.7554/eLife.94778)
Supplement: Figure 5—source data 2. [file elife-94778-fig5-data2.xlsx]

## Sheet: Sheet1
	Figure 5E: Cx43 in PMC monolayer
	Penetration, microm
treatment	none	Cx43	Cx43shRNA
	4.68	5.2	2.98
	2.54	2.96	2.93
	5.84	3.55	3.18
	4.08	3.55	3.02
	3.78	5.43	2.43
	4.76	6.84	2.69
	3.97	4.7
		5.44
Average	4.23571	4.70875	2.87167
SE	0.391728	0.459395	0.111847
Figure 5E: Anova1way (Tukey) for above Table
		MeanDiff	SEM	q Value	Prob	Alpha	Sig	LCL	UCL
PMC vs shRNA PMC		0.47304	0.51994	1.28665	0.64123	0.05	0	-0.85391	1.79999
PMCvs Cx43 PMC		-1.36405	0.55891	3.45144	0.06226	0.05	0	-2.79048	0.06238
PMC Cx43 vs PMC shRNA		-1.83708	0.54255	4.78854	0.00878	0.05	1	-3.22175	-0.45241
