# Supplementary material for: Hypersensitive intercellular responses of endometrial stromal cells drive invasion in endometriosis
Source: eLife. 2024 Dec 11;13:e94778. doi: 10.7554/eLife.94778 (PMC11729374; doi:10.7554/eLife.94778)
Supplement: Figure 5—source data 3. [file elife-94778-fig5-data3.xlsx]

## Sheet: Sheet1
	Figure 5F: Cx43 in PMC monolayer with ESCs
	Penetration, microm
Dropped	-	ESC	ESC	ESC	ESC
Monolayer	LP9	LP9	LP9	LP9	LP9
Treatment	-	-	shRNA	DN	Cx43
	2.58	1.88	1.74	1.53	4.11
	1.72	4.03	1.57	1.17	3.37
	1.74	1.7	1.31	1.36	3.12
	1.96	1.19	1.64	1.94	6.38
	1	4.74	0.98	3.05	6.8
	2.01	1.78	1.55	2.51	3.64
	1.02	3.38	2.04	2.21	4.425
	0.86	4.95	1.32	3.87	3.41
		1.27
		1.56
		2.87
		2.24
		4.9
		4.06
		2.38
		2.41
Average	1.61125	2.83375	1.51875	2.205	4.40688
SE	0.214926	0.331846	0.113925	0.327616	0.505468
Figure 5F: Anova1way (Tukey) for above Table
		MeanDiff	SEM	q Value	Prob	Alpha	Sig	LCL	UCL
PMC vs PMC+ESC		1.2225	0.46501	3.71797	0.08271	0.05	0	-0.10132	2.54632
PMC vs PMC shRNA+ESC		-0.0925	0.53694	0.24363	0.99979	0.05	0	-1.62111	1.43611
PMC+ESC: untr vs shRNA		-1.315	0.46501	3.99929	0.05231	0.05	0	-2.63882	0.00882
PMC vs PMC DN+ESC		0.59375	0.53694	1.56384	0.80256	0.05	0	-0.93486	2.12236
PMC+ESC: untr. vs DN		-0.62875	0.46501	1.91221	0.66074	0.05	0	-1.95257	0.69507
PMC+ESC: DN vs shRNA		0.68625	0.53694	1.80747	0.70579	0.05	0	-0.84236	2.21486
PMC vs PMC Cx43+ESC		2.79563	0.53694	7.3632	4.87181e-05	0.05	1	1.26701	4.32424
PMC+ESC: untr. Vs Cx43		1.57313	0.46501	4.78432	0.01268	0.05	1	0.24931	2.89694
PMC+ESC: shRNA vs Cx43		2.88813	0.53694	7.60683	2.7699e-05	0.05	1	1.35951	4.41674
PMC+ESC: DN vs Cx43		2.20188	0.53694	5.79937	0.00161	0.05	1	0.67326	3.73049
