# Supplementary material for: Hypersensitive intercellular responses of endometrial stromal cells drive invasion in endometriosis
Source: eLife. 2024 Dec 11;13:e94778. doi: 10.7554/eLife.94778 (PMC11729374; doi:10.7554/eLife.94778)
Supplement: Figure 6—source data 1. [file elife-94778-fig6-data1.xlsx]

## Sheet: Sheet1
Figure 6D: Distance decay of penetration								Figure 6E: Distance decay of pemnetration with Cx43
PMC + ESC late Endo		PMC KD Cx43 + ESC late Endo		PMC + ESC early Endo				PMC + ESC late Endo		PMC Cx43 + ESC late Endo		PMC KD Cx43 + ESC late Endo
distance from ESC, microm	Pene-tration, microm	distance from ESC, microm	Pene-tration, microm	distance from ESC, microm	Pene-tration, microm			distance from ESC, microm	Pene-tration, microm	distance from ESC, microm	Pene-tration, microm	distance from ESC, microm	Pene-tration, microm
0	5340	0	2020	130	1980			104	3110	0	4110	0	1360
17	4900	312	3110	136	3880			231	3790	122	3370	94	1730
80	4530	345	3470	269	990			238	1710	206	2830	145	1690
146	5090	460	2120	438	1380			249	2450	213	3310	149	2210
311	3830	663	2650	624	2550			349	3380	496	3400	467	1150
630	2860	748	2410	625	950			428	960	721	2210	643	980
642	2650	1115	3430	743	2630			457	1980	738	3310	738	1760
699	2910			1094	2570			605	1760	726	2960	1015	1780
712	3160
816	3190
