# Supplementary material for: Hypersensitive intercellular responses of endometrial stromal cells drive invasion in endometriosis
Source: eLife journal article supplement (doi:10.7554/elife.94778), 2024-12-11
Supplement: supp [file elife-94778-supp-v2.zip]

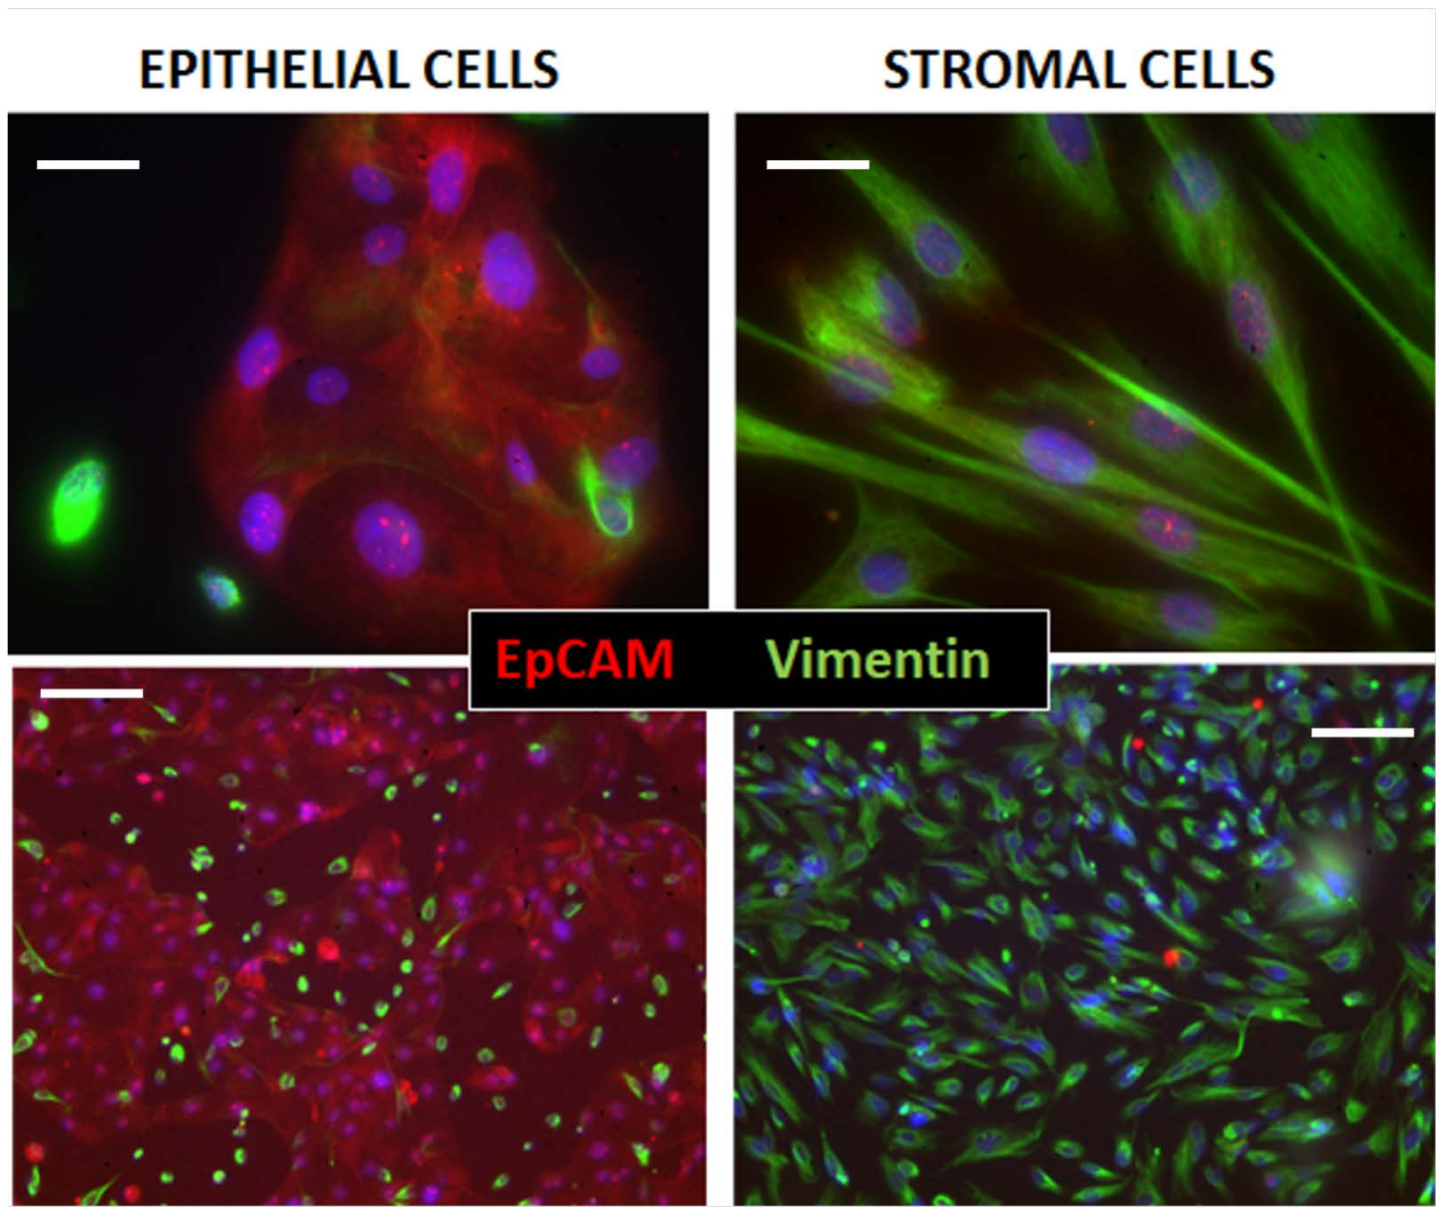

**Fig. S1: Immunocytochemical assessment of Epithelial and Stromal cell isolations from patients.**
