# Supplementary material for: Hypersensitive intercellular responses of endometrial stromal cells drive invasion in endometriosis
Source: eLife journal article supplement (doi:10.7554/elife.94778), 2024-12-11

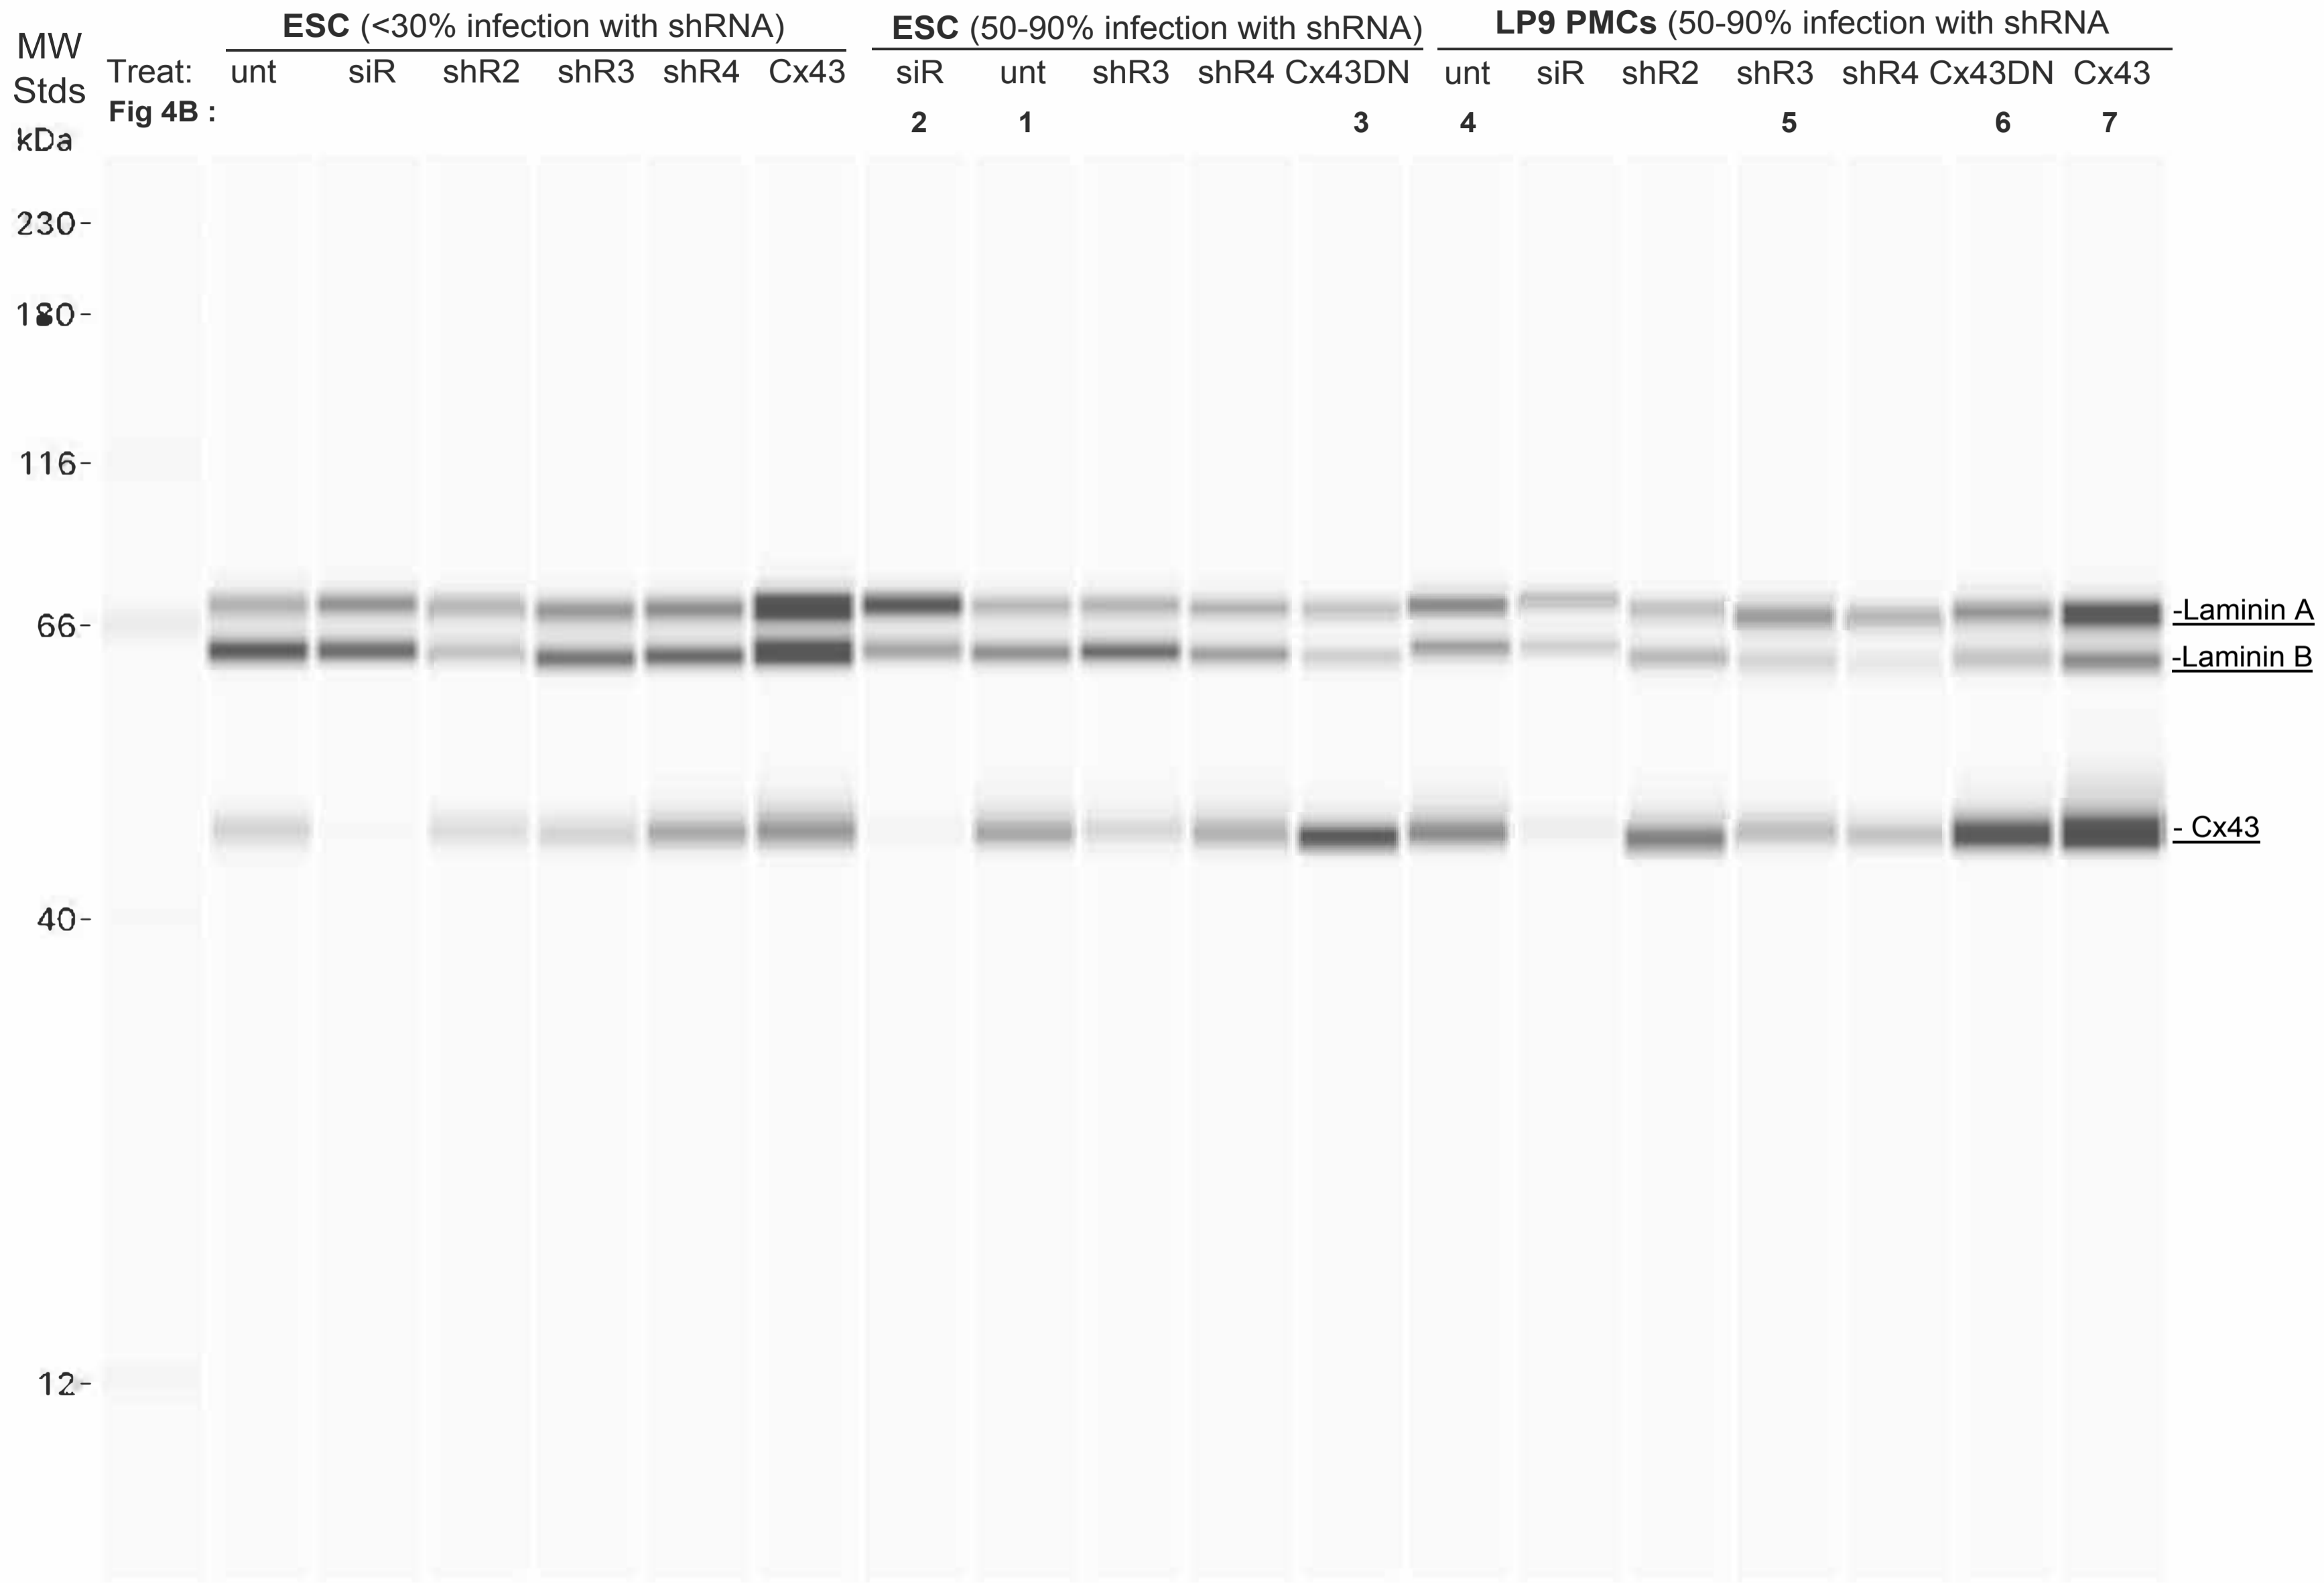

Supplement: supp [file elife-94778-supp-v2.zip]
